# Supplementary material for: Synthesis and superior electrochemical properties of shaggy hollow Zn-doped Fe2O3nanospheres for high-performance lithium-ion batteries
Source: Royal Society of Chemistry journal article supplement (doi:10.1039/c5ce02408k), 2016-01-01
Supplement: c5ce02408k1.pdf [file c5ce02408k1.pdf]

# Synthesis and superior electrochemical properties of shaggy hollow Zn-doped $\text{Fe}_2\text{O}_3$ nanospheres for high performance lithium-ion batteries

Guangda Li\*, Xiaoyun Xu, Rumeng Han and Jingyun Ma

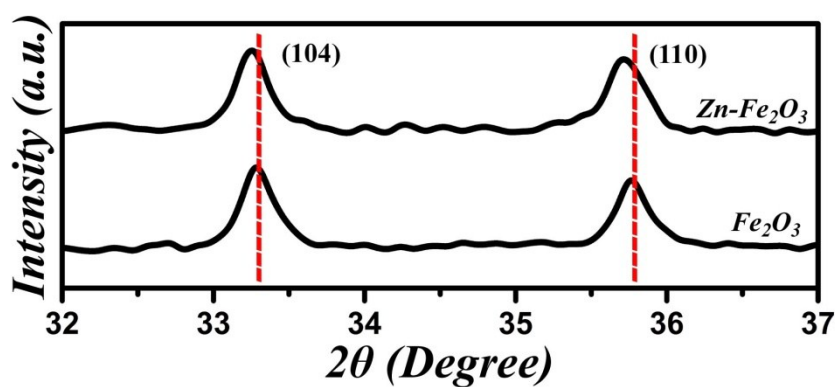

Fig. S1 XRD pattern of the magnified (104) and (110) peaks.

Table S1 The content of Zn in final products tested by ICP.

| $n_{\text{Zn}(\text{CH}_3\text{COO})_2 \cdot 2\text{H}_2\text{O}}$ (mmol) | The content of Zn in final products |
|---------------------------------------------------------------------------|-------------------------------------|
| 6                                                                         | 15.54%                              |
| 4                                                                         | 15.19%                              |
| 2                                                                         | 6.83%                               |
| 1                                                                         | 2.46%                               |

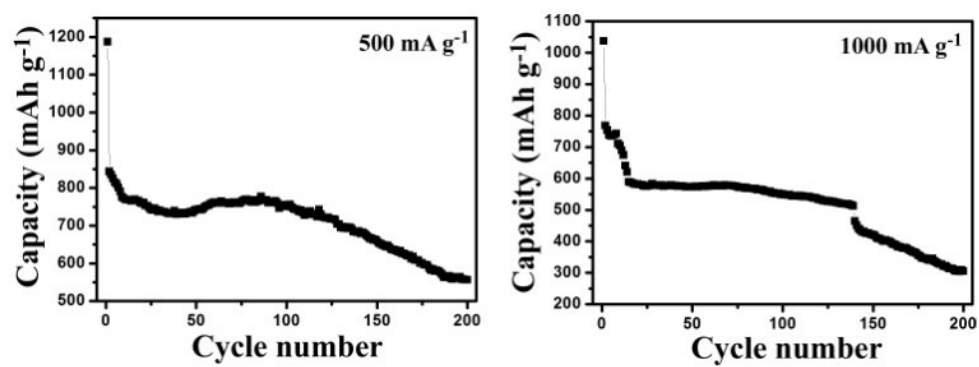

Fig. S2 Cycling performance of  $\text{Fe}_2\text{O}_3$  at 500 and 1000  $\text{mA g}^{-1}$ .
